# Supplementary material
Source: PubMed Central journal article supplement (PMC3981095)
Supplement: embor2013169s1.pdf [file embor2013169s1.pdf]

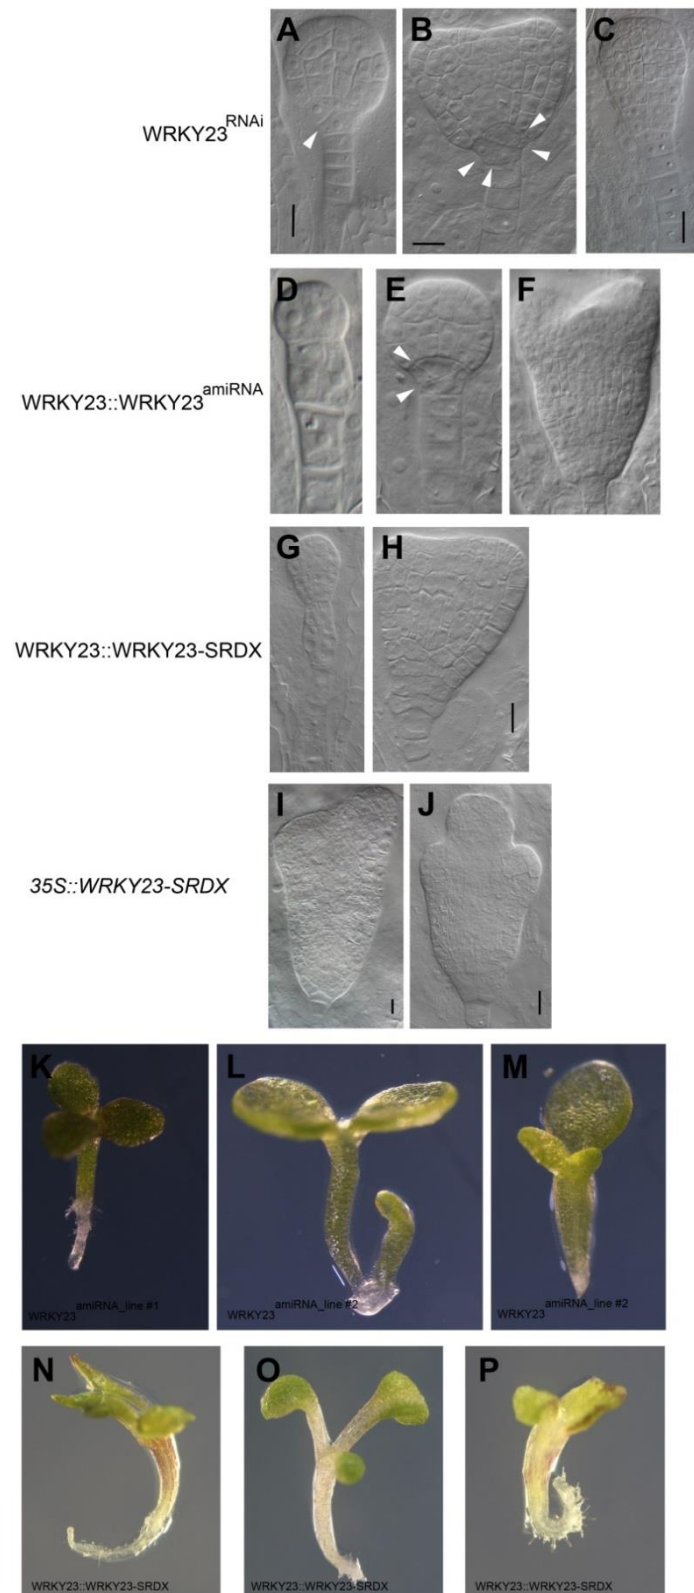

**Supplemental Figure S1.** Embryo phenotypes in WRKY23<sup>RNAi</sup> (A – C), WRKY23::WRKY23<sup>amiRNA</sup> (D – F), WRKY23::WRKY23-SRDX (G – H), and 35S::WRKY23-SRDX (I – J). Scale bar, 10  $\mu$ m. Arrowheads point to irregular hypophysis divisions. (K-L) Seedling phenotypes for independent WRKY23::WRKY23<sup>amiRNA</sup> lines. (N-P) Seedling phenotypes for WRKY23::WRKY23-SRDX phenotypes.

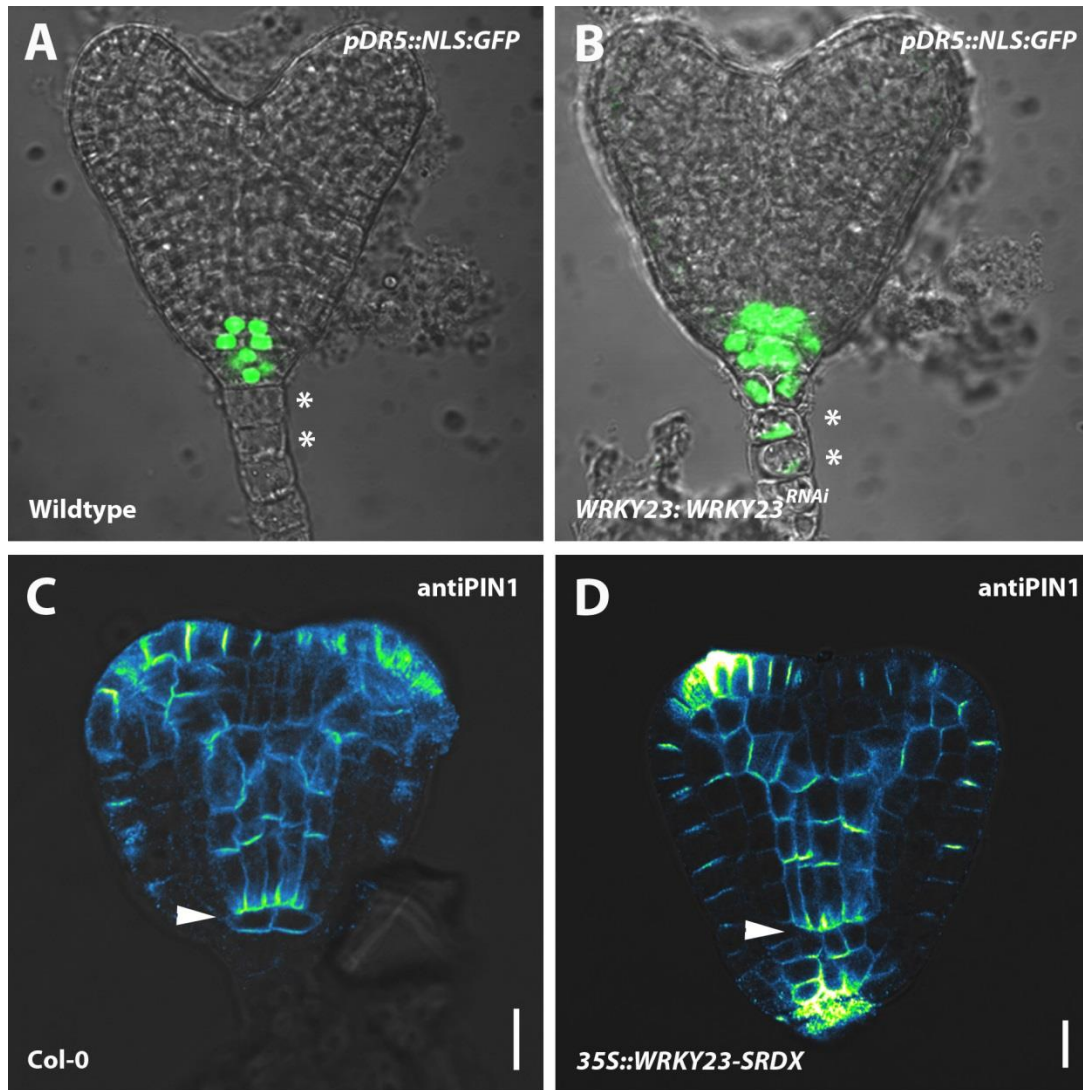

**Figure S2.** Auxin response and transport in lines with reduced WRKY23 levels or activity. (A-B) pDR5::NLS:GFP in wildtype (A) and *WRKY23::WRKY23<sup>RNAi</sup>*. (C-D) PIN1 localisation in wildtype (C) and *35S::WRKY23-SRDX* using PIN1 antibody (antiPIN1).

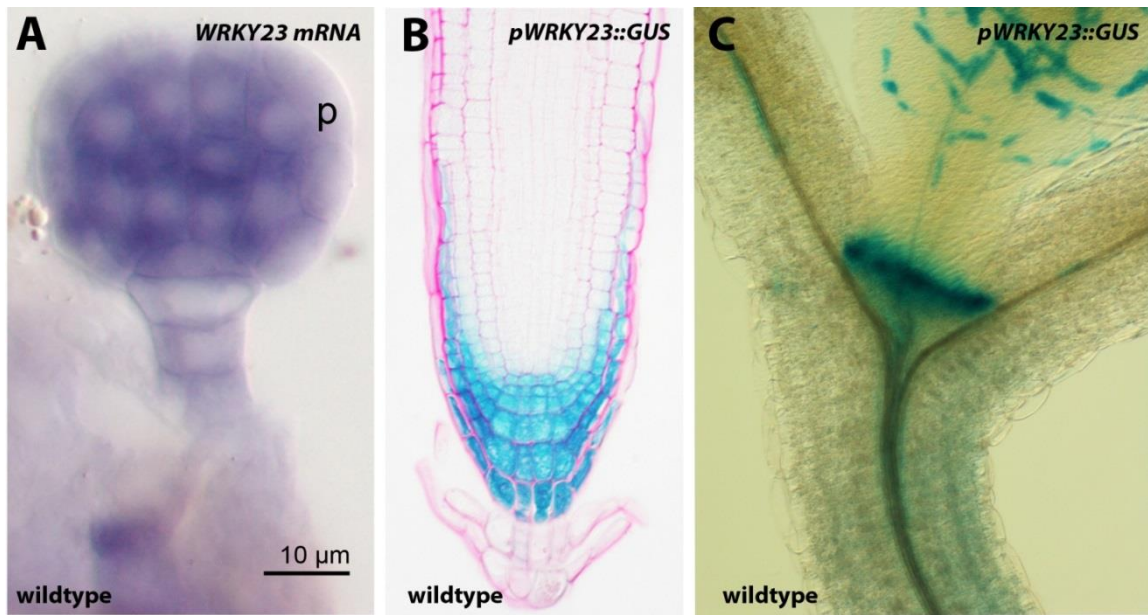

**Figure S3.** *WRKY23* expression in (A) late globular embryo using mRNA in situ and (B-C) *pWRKY23::GUS* in 5-day old seedling root tip (B) and shoot apical meristem (C).

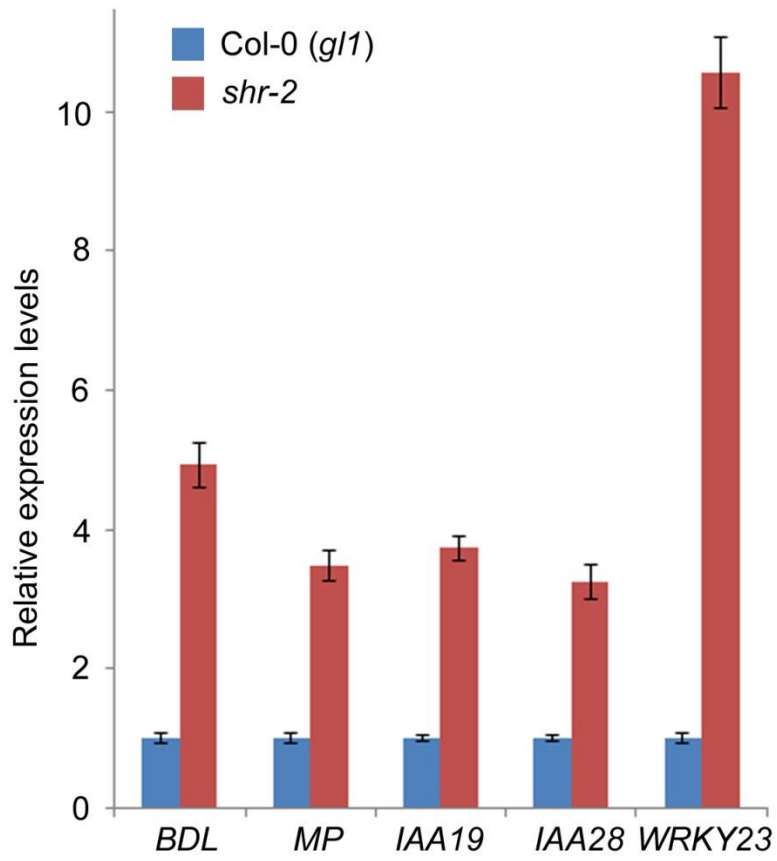

**Figure S4.** Expression level of *WRKY23* and auxin responsive genes in 3-day old *shr-2* root tips. Standard error is indicated.

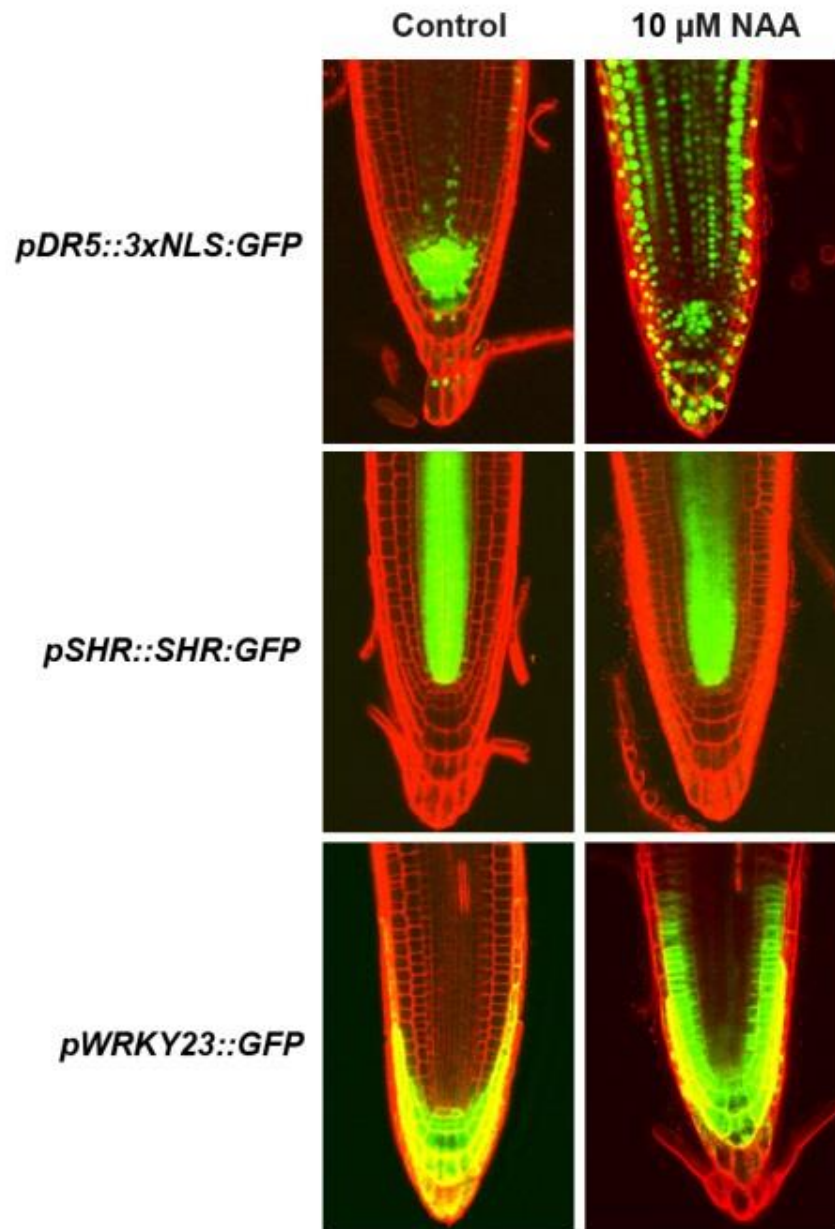

**Figure S5.** Tissue-specific induction of *WRKY23* by 10  $\mu$ M NAA for 4 hours.

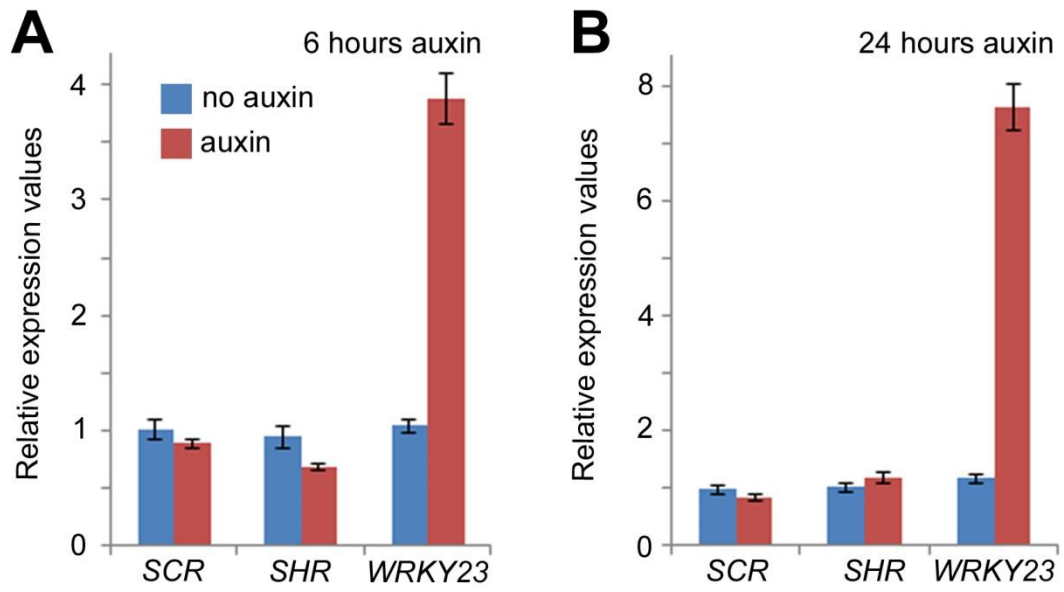

**Figure S6.** Auxin treatment (6 hours or 24 hours of 10  $\mu$ M NAA) on 6-day old wildtype (Col-0) seedlings. Experiment performed in triplicate. Standard error is indicated.

**Table S1.** Frequencies of defects observed in embryos of WT Col-0, *WRKY23::WRKY23RNAi* lines, *WRKY23::WRKY23amiRNA*, *35S::WRKY23-SRDX* and *WRKY23::WRKY23-SRDX*. (n.r. = not relevant)

| line                        | stage         | no defects      | polarity defects | hypophysis defects |
|-----------------------------|---------------|-----------------|------------------|--------------------|
| WT Col-0                    | pre-globular  | 169/171 (98.8%) | 2/171 (1.2%)     | n.r.               |
|                             | globular      | 175/180 (97.2%) | 2/180 (1.1%)     | 3/180 (1.7%)       |
|                             | post-globular | 141/151 (93.4%) | 0/151 (0%)       | 10/151 (6.6%)      |
| <i>WRKY23::WRKY23RNAi</i>   | pre-globular  | 166/183 (90.7%) | 17/183 (9.3%)    | n.r.               |
|                             | globular      | 277/341 (81.2%) | 35/341 (10.3%)   | 29/341 (8.5%)      |
|                             | post-globular | 302/383 (78.9%) | 23/383 (6.0%)    | 58/383 (15.1%)     |
| <i>WRKY23::WRKY23amiRNA</i> | pre-globular  | 107/119 (89.9%) | 12/119 (10.1%)   | n.r.               |
|                             | globular      | 54/71 (76.0%)   | 9/71 (12.7%)     | 8/71 (11.3%)       |
|                             | post-globular | 121/182 (66.5%) | 14/182 (7.7%)    | 47/182 (25.8%)     |
| <i>35S::WRKY23-SRDX</i>     | pre-globular  | 54/54 (100.0%)  | 0/54 (0%)        | n.r.               |
|                             | globular      | 39/58 (67.2%)   | 4/58 (6.9%)      | 15/58 (25.9%)      |
|                             | post-globular | 58/85 (68.2%)   | 3/85 (3.5%)      | 24/85 (28.2%)      |
| <i>WRKY23::WRKY23-SRDX</i>  | pre-globular  | 248/267 (92.9%) | 19/267 (7.1%)    | n.r.               |
|                             | globular      | 190/234 (81.2%) | 17/234 (7.3%)    | 27/234 (11.5%)     |
|                             | post-globular | 233/344 (67.7%) | 20/344 (5.8%)    | 91/344 (26.5%)     |

**Table S2.** Frequencies of defects observed in heart stage embryos of WT Col-0, WT Ws, *tt4-8*, *tt7-5* and *tt7-6*

| line (associated wildtype) | Wild-type looking embryos | Hypophysis defects |
|----------------------------|---------------------------|--------------------|
| wildtype Ws                | 197/203 (97.0%)           | 6/203 (3.0%)       |
| <i>tt4-8</i> (Ws)          | 170/176 (96.6%)           | 6/176 (3.4%)       |
| wildtype Col-0             | 152/155 (99.1%)           | 3/155 (1.9%)       |
| <i>tt7-5</i> (Col-0)       | 309/316 (97.8%)           | 7/316 (2.2%)       |
| <i>tt7-6</i> (Col-0)       | 321/327 (98.1%)           | 6/327 (1.8%)       |



**Table S3.** Primers used for construction of the WRKY23 amiRNAs

amiRNA1 "TTTCACGTTACATGAAGGCGT" (target in exon 3)

| Primers | sequence                                 |
|---------|------------------------------------------|
| miR-s   | gaTTTCACGTTACATGAAGGCGTtctctctttgtattcc  |
| miR-a   | gaACGCCTTCATGTAACGTGAAAtcaaagagaatcaatga |
| miR*s   | gaACACCTTCATGTATCGTGAATtcacaggtcgtgatatg |
| miR*a   | gaATTCACGATACATGAAGGTGTtctacatatatattcct |

amiRNA2 "TTGAACGCTTTCATACGGCCG" (target in 5'UTR)

| Primers | sequence                                 |
|---------|------------------------------------------|
| miR-s   | gaTTGAACGCTTTCATACGGCCGtctctctttgtattcc  |
| miR-a   | gaCGGCCGTATGAAAGCGTTCAAtcaaagagaatcaatga |
| miR*s   | gaCGACCGTATGAAACCGTTCATtcacaggtcgtgatatg |
| miR*a   | gaATGAACGGTTCATACGGTCGtctacatatatattcct  |

amiRNA3 "TTTTGACGTCACTAATTGCGC" (target in exon 1)

| Primers | sequence                                 |
|---------|------------------------------------------|
| miR-s   | gaTTTTGACGTCACTAATTGCGCtctctctttgtattcc  |
| miR-a   | gaGCGCAATTAGTGACGTCAAAAtcaaagagaatcaatga |
| miR*s   | gaGCACAATTAGTGAGGTCAAATtcacaggtcgtgatatg |
| miR*a   | gaATTTGACCTCACTAATTGTGCtctacatatatattcct |

**Table S4.** Primers used for qRT-PCR

| Gene                                | Primer sequence                      |
|-------------------------------------|--------------------------------------|
| <i>WRKY23_FW</i>                    | 5'-AGTCTCGGTAATGGTTGCTTTGG-3'        |
| <i>WRKY23_REV</i>                   | 5'-TGTTGCTGCTGTTGGTGATGG-3'          |
| <i>BDL_FW</i>                       | 5'-GGTACTACTTGTTCGAGAAAAGGTTAAACC-3' |
| <i>BDL_REV</i>                      | 5'-CCCCTTCCTTATCTTCATAAGTGAGTAC-3'   |
| <i>MP_FW</i>                        | 5'-ACAAGCTTTAAAGACTACGAGGAGCTA-3'    |
| <i>MP_REV</i>                       | 5'-CGAGCTTTGTGGGTGAGTTAGTAG-3'       |
| <i>IAA19_FW</i>                     | 5'-TGATGTACCTTGGGGGATGT-3'           |
| <i>IAA19_REV</i>                    | 5'-TGAACCAGCTCCTTGCTTCT-3'           |
| <i>IAA28_FW</i>                     | 5'-ATGCCGTTGACCAACTCTTC-3'           |
| <i>IAA28_REV</i>                    | 5'-CATCCCCGACCAGAACTTTA-3'           |
| <i>SHR_FW</i>                       | 5'-ACCACAACCATCACAACCACAAC-3'        |
| <i>SHR_REV</i>                      | 5'-CGAAGGACGGAGGAGTTTGAGG-3'         |
| <i>SCR_FW</i>                       | 5'-GACGCCATTATCAGAGACCTTATC-3'       |
| <i>SCR_REV</i>                      | 5'-GGAGCCTGTATTCAAGAAGAGC-3'         |
| <i>ACT7_FW</i>                      | 5'-ACTCTTCCTGATGGACAGGTG-3'          |
| <i>ACT7_REV</i>                     | 5'-CTCAACGATTCCATGCTCCT-3'           |
| <i>EEF1<math>\alpha</math>4_FW</i>  | 5'CTGGAGGTTTTTGAGGCTGGTAT-3'         |
| <i>EEF1<math>\alpha</math>4_REV</i> | 5'-CCAAGGGTGAAAGCAAGAAGA-3'          |
| <i>CDKA_FW</i>                      | 5'-ATTGCGTATTGCCACTCTCATAGG-3'       |
| <i>CDKA_REV</i>                     | 5'-TCCTGACAGGGATACCGAATGC-3'         |

## Supplemental Materials and Methods

**GUS staining of embryos.** Embryos were dissected out of the ovules in 90% acetone. For embryos younger than globular stage, ovules were opened but the embryos were not dissected. After dissection, ovules and embryos were transferred to sieves (BD Falcon, cell strainer 40  $\mu$ m nylon) and were incubated under vacuum for 10 min in 90% acetone. Subsequently three washing steps were done under vacuum for 10 min each with a 0.5 M phosphate buffer ( $\text{Na}_2\text{HPO}_4/\text{NaH}_2\text{PO}_4$  (615/385), pH 7). Sieves were then transferred to GUS staining solution (X-Glu (1mM) dissolved in DMFO (0.5% v/v); Triton X-100 (0.5% v/v); EDTA (1mM);  $\text{K}_3\text{Fe}(\text{CN})_6$  (0.5mM);  $\text{K}_4\text{Fe}(\text{CN})_6$  (0.5mM); phosphate buffer (0.5 M); pH 7) and incubated for 1 h under vacuum. After vacuum infiltration, samples were incubated at 37 °C. The staining reaction was stopped by two washes with 0.5 M phosphate buffer under vacuum for 10 min each.

**Cloning.** For the WRKY23::WRKY23-SRDX construct, the pEN-L1-WRKY23SRDX-R2 [1] was Gateway recombined with pEN-L4-WRKY23prom-R1 [1] and pK7m24GW [2]. The amiRNA constructs were designed and constructed as described [3], using primers miR-s, miR-a, miR\*s and miR\*a (Table S3). Gateway recombination sites were added in the final PCR to clone the amiRNA constructs in pDONR221. The vector pK7m24GW was used as a Gateway destination vector together with pEN-L4-WRKY23prom-R1.

1. Grunewald W *et al* (2012) Transcription factor WRKY23 assists auxin distribution patterns during Arabidopsis root development through local control on flavonol biosynthesis. *Proc Natl Acad Sci U S A* **109**: 1554-1559
2. Karimi M, Depicker A, Hilson P (2007) Recombinational cloning with plant gateway vectors. *Plant Physiol* **145**: 1144-1154
3. Schwab R, Ossowski S, Riester M, Warthmann N, Weigel D (2006) Highly specific gene silencing by artificial microRNAs in Arabidopsis. *Plant Cell* **18**: 1121-1133
